# Supplementary material
Source: HighWire-hosted journal article supplement (doi:10.1101/rna.057224.116)
Supplement: Supp_Figure_Legends.docx [file Supp_Figure_Legends.docx]

**Supplementary Figure 1. THO and TREX-2 mutants do not show gross defects in translational repression or translational re-entry following stress***.* A. WT BY4741, *tex1Δ, mft1Δ, thp1Δ, thp2Δ* and *sac3Δ* strains were examined and quantified as in Figure 7.

**Supplementary Movies 1-3**: **TT foci are resistant to CHX.** Cells expressing pRP1657 (Pab1-GFP, Edc3-mCh) were examined in midlog. Each frame represents 5 minutes over a 1 hr timecourse. Z-stacks are displayed to ensure foci do not move out of the focal plane. Movie 1 demonstrates stress granule and P-body dispersal in response to 1hr of 100μg/ml cyclohexmide treatment, following prior stress granule induction by NaN3 (30 minutes, 0.5% w/v). Movie 2 demonstrates *hpr1Δ* TT foci resistance to cycloheximide. Movie 3 demonstrates *mft1Δ* TT foci resistance to cycloheximide.
