# Supplementary material
Source: HighWire-hosted journal article supplement (doi:10.1101/rna.057224.116)
Supplement: Supp_Table_S1.docx [file Supp_Table_S1.docx]

**Table S1: Co-localization frequencies of Pab1, Ded1, Pub1 and Pbp1 in THO and TREX-2 mutants**

| **Strain** | **% Pab1 foci co-localizing with Ded1** | **% Ded1 foci co-localizing with Pab11** | **% Pab1 foci co-localizing with Pbp1** | **% Pbp1 foci co-localizing with Pab12** | **% Pab1 foci co-localizing with Pub1** | **% Pub1 foci co-localizing with Pab13** |
| --- | --- | --- | --- | --- | --- | --- |
| *WT (NaN3 stress)* | 95.2% +/- 4.8 | 97.8% +/- 0.4 | 86.7% +/- 5.3% | 100% +/- 0% | 91.8% +/- 4.9% | 98.8% +/- 1.2% |
| *mft1Δ* | 100% +/- 0% | 89.4% +/- 0.6% | 87.5% +/- 12.5% | 100% +/- 0% | 81.1% +/- 7.3% | 97.2% +/- 2.8% |
| *hpr1Δ* | 89.0% +/- 4.4% | 91.2% +/- 8.8 | 28.7% +/- 12.0% | 70.8% +/- 20.8% | N/D | N/D |
| *tho2Δ* | 89.9% +/- 4.2% | 89.4% +/- 0.6% | 58.5% +/- 18.5% | 79.4% +/- 9.4% | 86.4% +/- 13.6% | 100% +/- 0% |
| *thp2Δ* | 83.8% +/- 7.6% | 94.1% +/- 5.9% | 54.0% +/- 1.6% | 92.3% +/- 7.7% | 71.8 +/- 5.1% | 90% +/- 10% |
| *sac3Δ* | 74.5% +/- 7.8% | 100% +/- 0% | N/D | N/D | N/D | N/D |
| +/- values are standard error of the mean, based on two biological replicates (separate cultures). N/D = not determined  1Ded1 foci localizing with Pab1 foci, averaged across all (5) quantitated THO/TREX mutant strains = 93.7% +/- 4.5% (st. dev)  2Pbp1 foci localizing with Pab1 foci, averaged across all (4) quantitated THO/TREX2 mutant strains = 57.1% +/- 24.1% (st. dev)  3Pub1 foci localizing with Pab1 foci, averaged across all (3) quantitated THO/TREX2 mutant strains = 95.7% +/- 5.2% (st.dev) | | | | | | |
