# Supplementary material
Source: HighWire-hosted journal article supplement (doi:10.1101/rna.057224.116)
Supplement: Supp_Table_S2.docx [file Supp_Table_S2.docx]

**Table S2: Co-localization frequencies of additional mRNP factors in “TT” foci in an *hpr1Δ* strain**

| **GFP tagged protein** | **% Ded1 foci co-localizing with GFP-tagged protein** | **% GFP-tagged protein foci co-localizing with Ded1** |
| --- | --- | --- |
| eIF4G2 | 60.4% +/- 1.1 | 80.8% +/- 8.1 |
| Dbp5 | 76.8% +/- 3.2 | 68.5%* +/- 7.7 |
| Pap1 | 70.8% +/- 4.2 | 58.3% +/- 8.3 |
| Gle1 | 47.4% +/- 10.5 | 25.9%* +/- 13.4 |
| Thp1 | 22.3% +/- 5.3 | 19.3% +/- 6.5 |
| Mft1 | 7.4% +/- 2.1 | 9.6% +/- 1.5 |
| Nab2 | 0% | 0% |
| Sto1 | 0% | 0%** |
| Nip1 | 0% | 0%** |
| * - Dbp5/Gle1 foci only counted if clearly distinguished from peri-nuclear area; ** - No foci observed  +/- values are standard error of the mean, based on two biological replicates | | |
