# Supplementary material
Source: HighWire-hosted journal article supplement (doi:10.1101/rna.057224.116)
Supplement: Supp_Table_S3.docx [file Supp_Table_S3.docx]

**Table S3: Strains and plasmids used in this study**

| **Yeast strains** |  |  |
| --- | --- | --- |
| **Name** | **Properties** | **Reference** |
| yRP2065 / yRB1 (BY4741 wt) | *MATa his3∆0 leu2∆0 met15∆0 ura3∆0* | Coller and Parker, 2005 |
| yRP1577 / yRB118 | *MatA ade2∆0 his3∆0 leu2∆0 trp1∆0 ura3∆0 mex67::HIS3 [Mex67-5; LEU2]* | Ed Hurt |
| yRP2930 / yRB119 | *MATa his3∆0 leu2∆0 met15∆0 ura3∆0 hpr1::KANMX* | DharmaconGE collection |
| yRP2931 / yRB120 | *MATa his3∆0 leu2∆0 met15∆0 ura3∆0 mft1::KANMX* | DharmaconGE collection |
| yRP2932 / yRB121 | *MATa his3∆0 leu2∆0 met15∆0 ura3∆0 tho2::KANMX* | DharmaconGE collection |
| yRP2933 / yRB122 | *MATa his3∆0 leu2∆0 met15∆0 ura3∆0 thp2::KANMX* | DharmaconGE collection |
| yRP2934 / yRB123 | *MATa his3∆0 leu2∆0 met15∆0 ura3∆0 thp1::KANMX* | DharmaconGE collection |
| yRP2935 / yRB124 | *MATa his3∆0 leu2∆0 met15∆0 ura3∆0 sac3::KANMX* | DharmaconGE collection |
| yRP2936 / yRB125 | *MATa his3∆0 leu2∆0 met15∆0 ura3∆0 tex1::KANMX* | DharmaconGE collection |
| yRP2937 / yRB126 | *MATa his31 leu20 met150 ura30 eIF4G2-GFP::HIS3 hpr1::HYGB* | This study |
| yRP2938 / yRB127 | *MATa his31 leu20 met150 ura30 DBP5-GFP::HIS3 hpr1::HYGB* | This study |
| yRP2939 / yRB128 | *MATa his31 leu20 met150 ura30 GLE1-GFP::HIS3 hpr1::HYGB* | This study |
| yRP2940 / yRB129 | *MATa his31 leu20 met150 ura30 PAP1-GFP::HIS3 hpr1::HYGB* | This study |
| yRP2941 / yRB130 | *MATa his31 leu20 met150 ura30 THP1-GFP::HIS3 hpr1::HYGB* | This study |
| yRP2942 / yRB131 | *MATa his31 leu20 met150 ura30 MFT1-GFP::HIS3 hpr1::HYGB* | This study |
| yRP2943 / yRB132 | *MATa his31 leu20 met150 ura30 NAB2-GFP::HIS3 hpr1::HYGB* | This study |
| yRP2944 / yRB133 | *MATa his31 leu20 met150 ura30 STO1-GFP::HIS3 hpr1::HYGB* | This study |
| yRP2945 / yRB134 | *MATa his31 leu20 met150 ura30 NIP1-GFP::HIS3 hpr1::HYGB* | This study |
| yRP2946 / yRB135 | *MATa his3∆0 leu2∆0 met15∆0 ura3∆0 hpr1::KANMX atg15::HPH* | This study |
| yRP2947 / yRB136 | *MATa his3∆0 leu2∆0 met15∆0 ura3∆0 thp2::KANMX atg15::HPH* | This study |
| yRP2948 / yRB137 | *MATa his3∆0 leu2∆0 met15∆0 ura3∆0 tex1::KANMX atg15::HPH* | This study |
| **Plasmids** |  |  |
| **Name** | **Properties** | **Reference** |
| pRP1657 / pRB1 | Pab1-GFP, Edc3-mCh; Cen; URA3 marker | Buchan et al, 2008 |
| pRP2478 / pRB16 | Pab1-GFP; Cen; LEU2 marker | This study |
| pRP2150 / pRB20 | Pub1-mCh; Cen; LEU2 marker | Buchan et al, 2010 |
| pRP1920 / pRB21 | Pbp1-mCh; Cen; URA3 marker | Swisher et al, 2010, PLOS One, Parker lab |
| pRP2132 / pRB108 | Ded1-mCh; Cen; URA3 marker | Hilliker et al, 2010, Mol. Cell, Parker lab |
| pRB28 | GFP-Atg8; Cen; URA3 marker | Krick et al, 2010, JCB (Thumm lab) |
|  |  |  |
